# Supplementary material for: Biological Evaluation, DFT Calculations and Molecular Docking Studies on the Antidepressant and Cytotoxicity Activities of Cycas pectinata Buch.-Ham. Compounds
Source: Pharmaceuticals (Basel). 2020 Sep 3;13(9):232. doi: 10.3390/ph13090232 (PMC7557754; doi:10.3390/ph13090232)
Supplement: Supplementary file 1 [file pharmaceuticals-13-00232-s001.docx]

***Supplementary Materials***

**Biological Evaluation, DFT Calculations and Molecular Docking Studies on the Antidepressant and Cytotoxicity Activities of *Cycas pectinata* Buch.-Ham. Compounds**

**Jinnat Rahman 1,†, Abu Montakim Tareq 1,†, Md. Mohotasin Hossain 1, Shahenur Alam Sakib 2, Mohammad Nazmul Islam 1, Md. Hazrat Ali 1, A. B. M. Neshar Uddin 1, Muminul Hoque 1, Mst. Samima Nasrin 1, Talha Bin Emran 3, Raffaele Capasso 4,*, A. S. M. Ali Reza 1, 5,* and Jesus Simal-Gandara 6,***

1 Department of Pharmacy, International Islamic University Chittagong, Kumira, Chittagong-4318, Bangladesh; jinnatrahman14@gmail.com (J.R.); montakim0.abu@gmail.com (A.M.T.); mdjisan16@gmail.com (M.M.H.); sayeadiiuc@gmail.com (M.N.I.); hazratpharm@gmail.com (M.H.A.); nesharuddinemon1@gmail.com (A.B.M.N.U.); muminul359@gmail.com (M.H.); shathy_ru@yahoo.com (M.S.N)

2 Department of Theoretical and Computational Chemistry, University of Dhaka, Dhaka-1000, Bangladesh; sakibhasaniiuc@gmail.com (S.A.S.)

3 Department of Pharmacy, BGC Trust University Bangladesh, Chittagong-4381, Bangladesh; talhabmb@bgctub.ac.bd (T.B.E.)

4 Department of Agricultural Sciences, University of Naples Federico II, 80055 Portici, Italy

5 Department of Biochemistry and Molecular Biology, University of Chittagong, Chittagong-4331, Bangladesh

6 Nutrition and Bromatology Group, Department of Analytical and Food Chemistry, Faculty of 21 Food Science and Technology, University of Vigo – Ourense Campus, E32004 Ourense, Spain; jsimal@uvigo.es (J.S.G.)

*† These authors contributed equally to this work*

***** Correspondence: jsimal@uvigo.es (J.S.G.); rafcapas@unina.it (R.C.); alirezaru@gmail.com (A.S.M.A.R.)

Tel.: +34-988-387000 (J.S.G.); +39‐081‐678664 (R.C.); +8801722-584336 (A.S.M.A.R.)

**Table S1:** Mulliken atomic charges and NBO charges at different atoms in gas phase of 5-chloro-1-(trimethylsilyl)-1*H*-indole-2,3-dione 3-[O-(trimethylsilyl)-oxime] computed by B3LYP/methods with 6-31G+ (d, p) basis set.

|  | | **Atomic Charges**  **5-chloro-1-(trimethylsilyl)-1*H*-indole-2,3-dione 3-[O-(trimethylsilyl)-oxime]** | |
| --- | --- | --- | --- |
| **Sl. No.** | **Atom** | **Mulliken Charges** | **NBO Charges** |
| 1 | C | 0.235 | 0.187 |
| 2 | C | 0.280 | -0.091 |
| 3 | C | -0.643 | -0.211 |
| 4 | C | 0.458 | -0.041 |
| 5 | C | -0.732 | -0.235 |
| 6 | C | -0.417 | -0.266 |
| 7 | C | -0.219 | 0.620 |
| 8 | C | -0.276 | 0.110 |
| 9 | H | 0.152 | 0.275 |
| 10 | H | 0.146 | 0.265 |
| 11 | H | 0.130 | 0.250 |
| 12 | Cl | 0.417 | -0.046 |
| 13 | N | -0.021 | -0.800 |
| 14 | N | -0.481 | -0.090 |
| 15 | O | -0.258 | -0.539 |
| 16 | Si | **1.710** | 1.849 |
| 17 | C | -0.862 | -1.202 |
| 18 | C | **-0.877** | -1.209 |
| 19 | C | **-0.877** | -1.209 |
| 20 | H | 0.157 | 0.254 |
| 21 | H | 0.196 | 0.279 |
| 22 | H | 0.197 | 0.280 |
| 23 | H | 0.170 | 0.263 |
| 24 | H | 0.185 | 0.269 |
| 25 | H | 0.170 | 0.259 |
| 26 | H | 0.170 | 0.263 |
| 27 | H | 0.170 | 0.259 |
| 28 | H | 0.184 | 0.269 |
| 29 | O | 0.194 | -0.659 |
| 30 | Si | 1.252 | **1.905** |
| 31 | C | -0.810 | **-1.219** |
| 32 | C | -0.833 | **-1.224** |
| 33 | C | -0.828 | **-1.225** |
| 34 | H | 0.179 | 0.273 |
| 35 | H | 0.166 | 0.260 |
| 36 | H | 0.178 | 0.272 |
| 37 | H | 0.175 | 0.268 |
| 38 | H | 0.164 | 0.262 |
| 39 | H | 0.180 | 0.274 |
| 40 | H | 0.180 | 0.273 |
| 41 | H | 0.164 | 0.262 |
| 42 | H | 0.175 | 0.268 |

**Table S2:** Mulliken atomic charges and NBO charges at different atoms in gas phase of cyclopentadecanone oxime computed by B3LYP/methods with 6-31G+ (d, p) basis set.

|  | | **Atomic Charges**  Cyclopentadecanone oxime | |
| --- | --- | --- | --- |
| **Sl. No.** | **Atom** | **Mulliken Charges** | **NBO Charges** |
| 1 | C | -0.307 | -0.462 |
| 2 | C | -0.310 | -0.468 |
| 3 | C | -0.302 | -0.476 |
| 4 | C | -0.311 | -0.471 |
| 5 | C | -0.298 | -0.466 |
| 6 | C | -0.298 | -0.475 |
| 7 | C | -0.293 | -0.463 |
| 8 | C | -0.306 | -0.479 |
| 9 | C | -0.309 | -0.469 |
| 10 | C | -0.355 | -0.525 |
| 11 | C | -0.346 | -0.497 |
| 12 | C | 0.273 | 0.238 |
| 13 | C | -0.290 | -0.466 |
| 14 | N | -0.209 | -0.170 |
| 15 | O | **-0.638** | **-0.620** |
| 16 | H | **0.428** | **0.491** |
| 17 | H | 0.169 | 0.236 |
| 18 | H | 0.214 | 0.278 |
| 19 | H | 0.187 | 0.259 |
| 20 | H | 0.154 | 0.236 |
| 21 | H | 0.161 | 0.244 |
| 22 | H | 0.152 | 0.240 |
| 23 | H | 0.151 | 0.239 |
| 24 | H | 0.151 | 0.237 |
| 25 | H | 0.150 | 0.236 |
| 26 | H | 0.150 | 0.238 |
| 27 | H | 0.155 | 0.241 |
| 28 | H | 0.151 | 0.218 |
| 29 | H | 0.173 | 0.250 |
| 30 | H | 0.154 | 0.239 |
| 31 | C | -0.298 | -0.472 |
| 32 | H | 0.151 | 0.235 |
| 33 | H | 0.155 | 0.237 |
| 34 | H | 0.148 | 0.224 |
| 35 | H | 0.153 | 0.244 |
| 36 | C | -0.303 | -0.479 |
| 37 | H | 0.151 | 0.238 |
| 38 | H | 0.151 | 0.238 |
| 39 | H | 0.192 | 0.267 |
| 40 | H | 0.172 | 0.234 |
| 41 | H | 0.156 | 0.241 |
| 42 | H | 0.152 | 0.240 |
| 43 | H | 0.158 | 0.226 |
| 44 | H | 0.155 | 0.244 |
| 45 | H | 0.156 | 0.246 |
| 46 | H | 0.150 | 0.221 |

**Table S3:** Mulliken atomic charges and NBO charges at different atoms in gas phase of *trans*-2-dodecen-1-ol trifluoroacetate computed by B3LYP/methods with 6-31G+ (d, p) basis set.

|  | | **Atomic charges**  ***trans*-2-dodecen-1-ol trifluoroacetate** | |
| --- | --- | --- | --- |
| **No** | **Atom** | **Mulliken charges** | **NBO charges** |
| 1 | C | **0.769** | **0.983** |
| 2 | C | 0.467 | 0.675 |
| 3 | O | **-0.480** | -0.519 |
| 4 | C | -0.105 | -0.163 |
| 5 | C | -0.077 | -0.268 |
| 6 | C | -0.066 | -0.169 |
| 7 | C | -0.306 | -0.497 |
| 8 | C | -0.240 | -0.459 |
| 9 | C | -0.239 | -0.465 |
| 10 | C | -0.240 | -0.463 |
| 11 | C | -0.239 | -0.463 |
| 12 | C | -0.239 | -0.464 |
| 13 | C | -0.231 | -0.466 |
| 14 | C | -0.237 | -0.466 |
| 15 | C | -0.405 | -0.697 |
| 16 | H | 0.130 | 0.239 |
| 17 | H | 0.131 | 0.232 |
| 18 | H | 0.131 | 0.232 |
| 19 | H | 0.123 | 0.233 |
| 20 | H | 0.123 | 0.233 |
| 21 | H | 0.119 | 0.231 |
| 22 | H | 0.119 | 0.231 |
| 23 | H | 0.120 | 0.232 |
| 24 | H | 0.120 | 0.232 |
| 25 | H | 0.121 | 0.232 |
| 26 | H | 0.121 | 0.232 |
| 27 | H | 0.121 | 0.232 |
| 28 | H | 0.122 | 0.233 |
| 29 | H | 0.123 | 0.233 |
| 30 | H | 0.124 | 0.234 |
| 31 | H | 0.126 | 0.234 |
| 32 | H | 0.131 | 0.239 |
| 33 | H | 0.146 | 0.253 |
| 34 | H | 0.138 | 0.244 |
| 35 | H | 0.127 | 0.228 |
| 36 | H | 0.143 | 0.241 |
| 37 | H | 0.181 | 0.247 |
| 38 | H | 0.184 | 0.252 |
| 39 | F | -0.262 | -0.337 |
| 40 | F | -0.261 | -0.336 |
| 41 | F | -0.258 | -0.331 |
| 42 | O | -0.377 | **-0.524** |


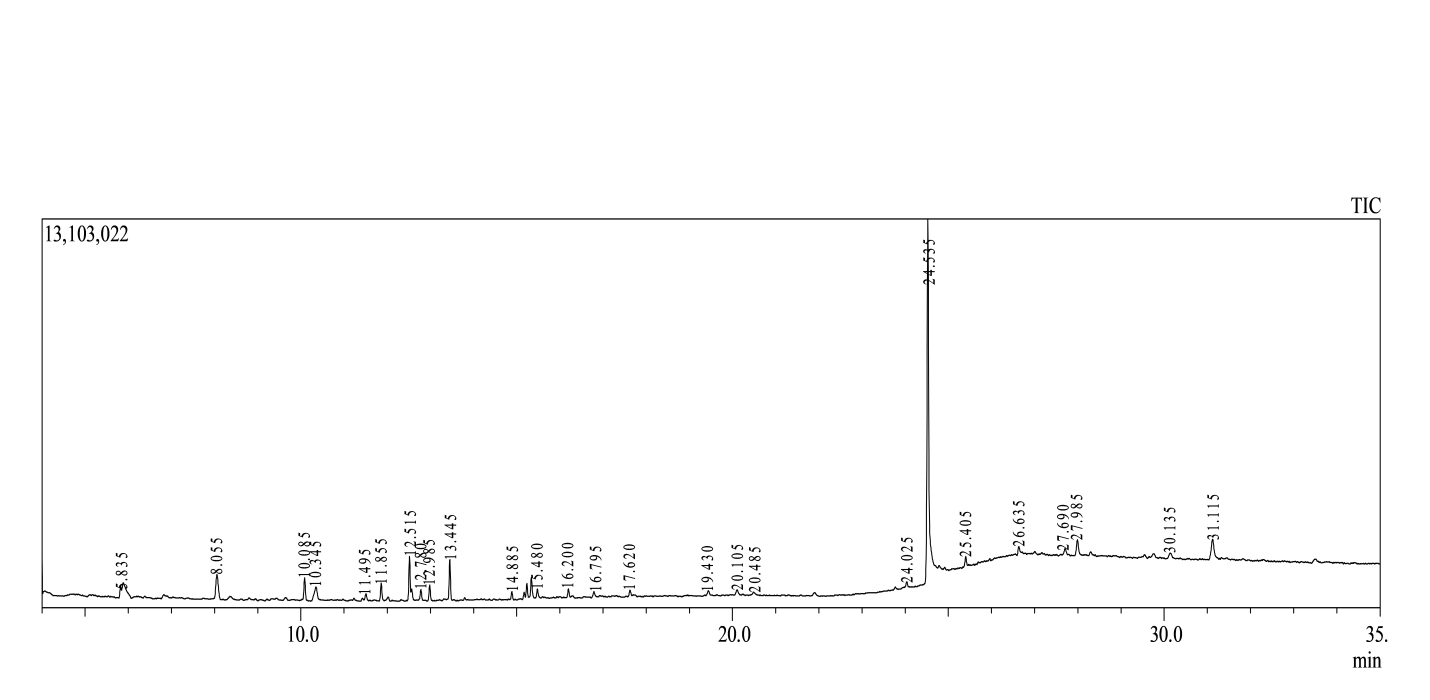


Figure S1: Total ionic chromatogram (TIC) of MECP by GC-MS.

|  | |
| --- | --- |
| 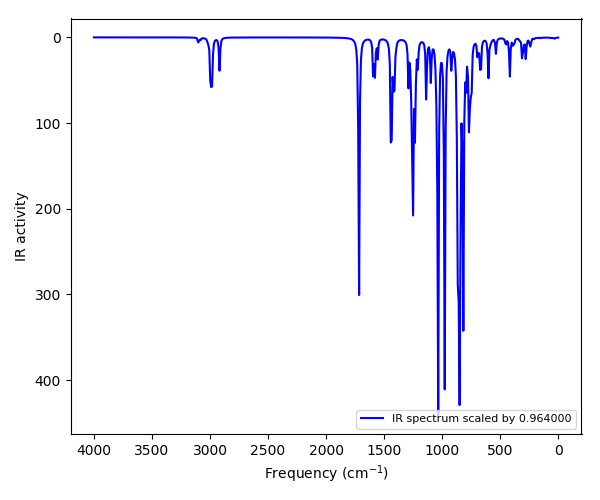  **A** |
| 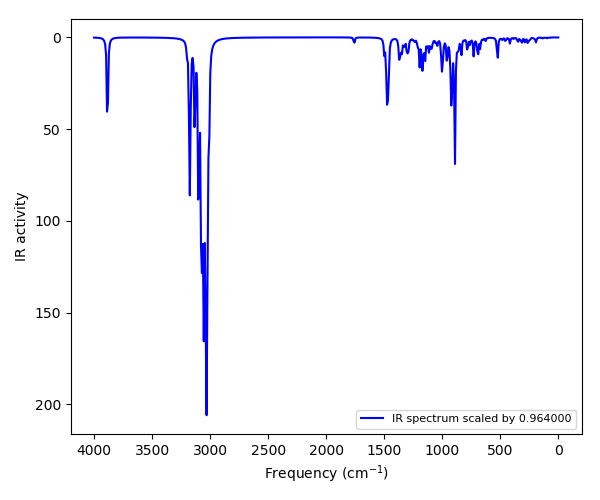  **B** |
| 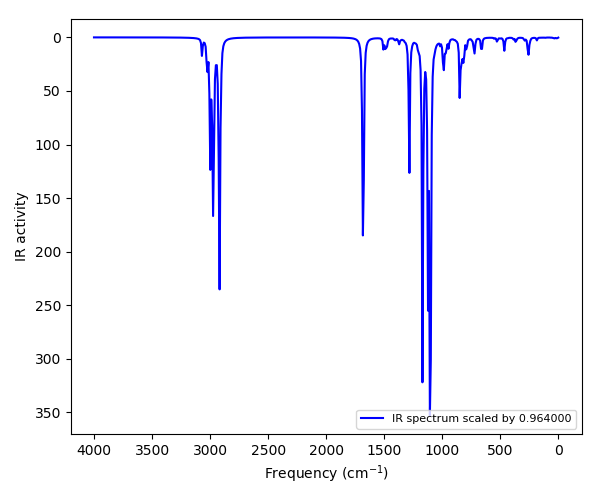  **C** |

Figure S2: Fourier transform Infrared- (FT-IR) spectrum of 5-chloro-1-(trimethylsilyl)-1*H*-indole-2,3-dione 3-[O-(trimethylsilyl)-oxime] (A); cyclopentadecanone oxime (B); *trans*-2-dodecen-1-ol trifluoroacetate (C), respectively in the wavenumber range 4000 – 0 cm-1.

| 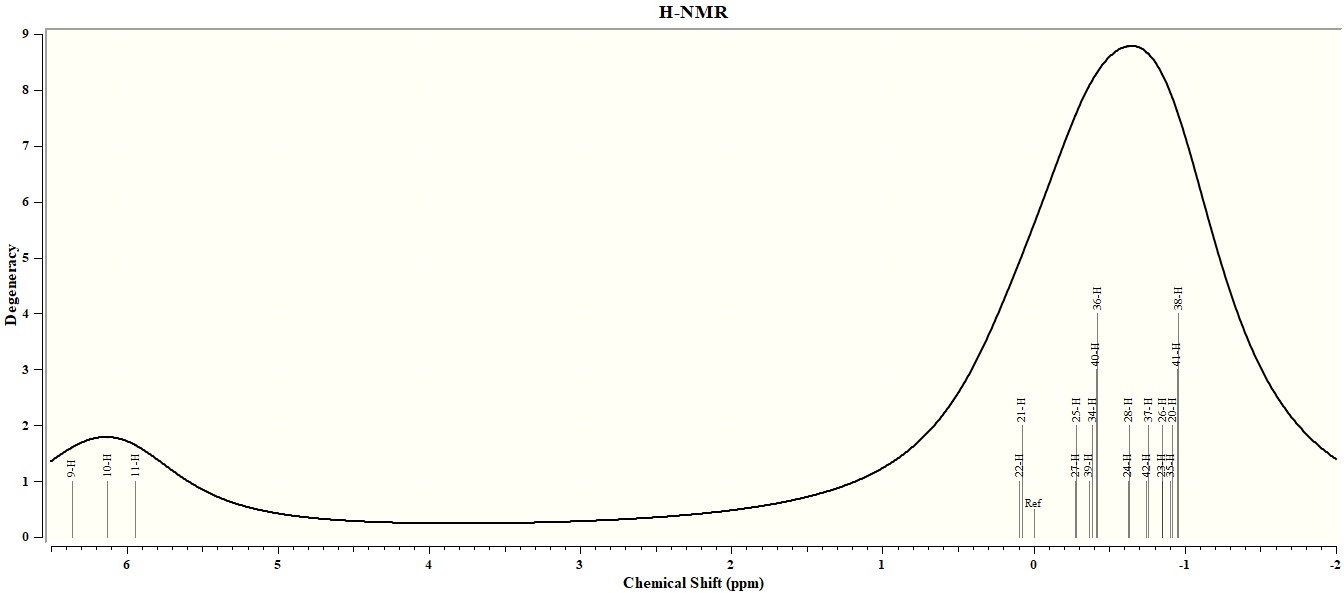  **A** |
| --- |
| 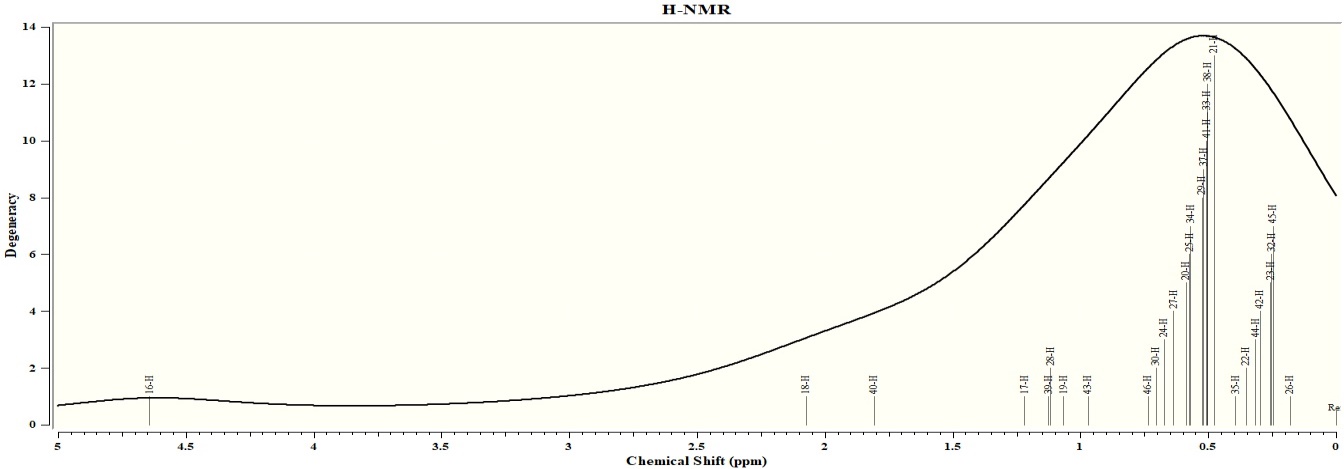  **B** |
| 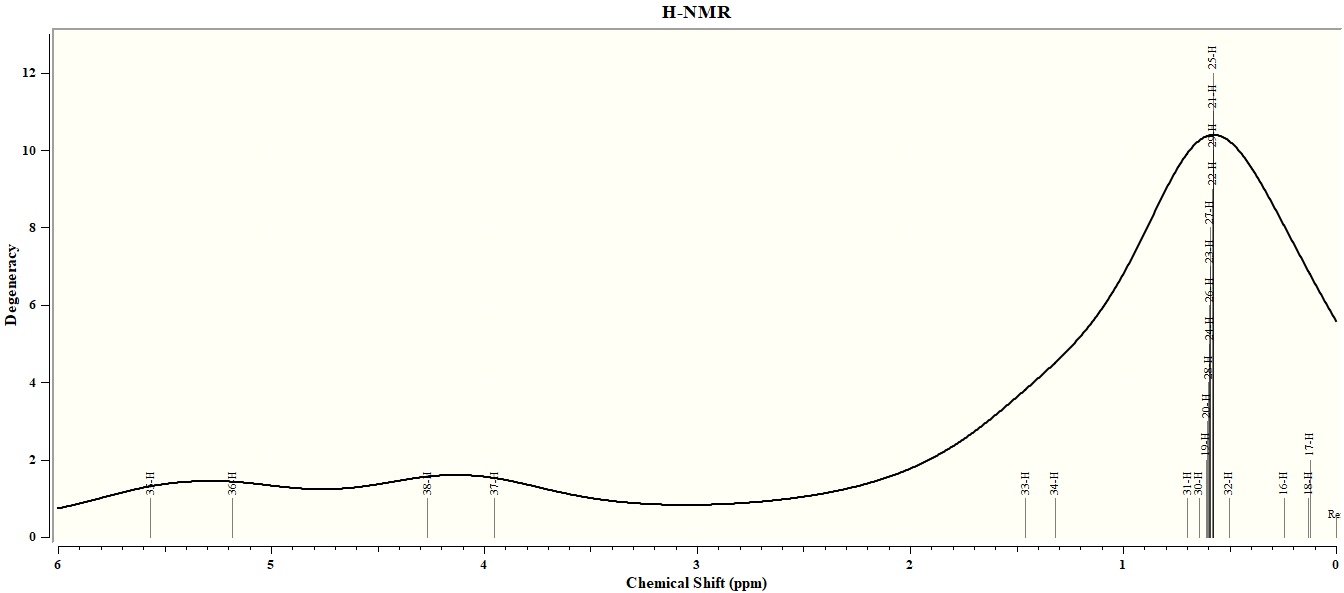  **C** |

Figure S3: Calculated 1H NMR isotropic chemical shift spectrum of 5-chloro-1-(trimethylsilyl)-1*H*-indole-2,3-dione 3-[O-(trimethylsilyl)-oxime] (A); cyclopentadecanone oxime (B); *trans*-2-dodecen-1-ol trifluoroacetate (C), respectively in chloroform solvent.

|  | |
| --- | --- |
| 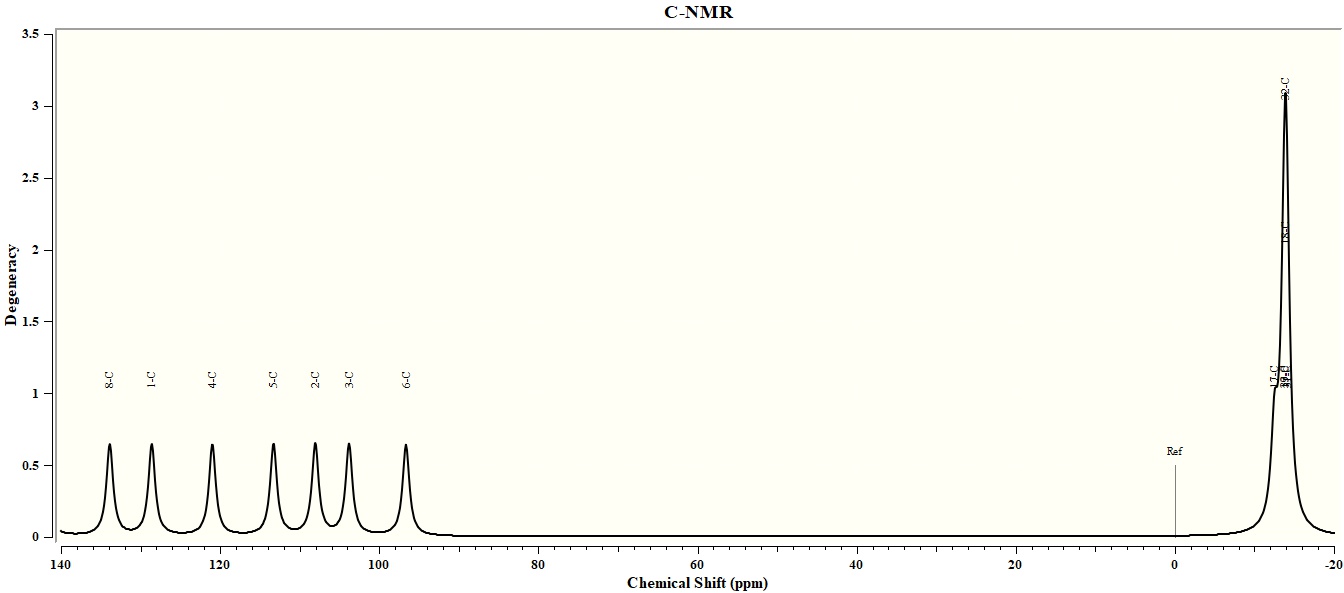  **A** |
| 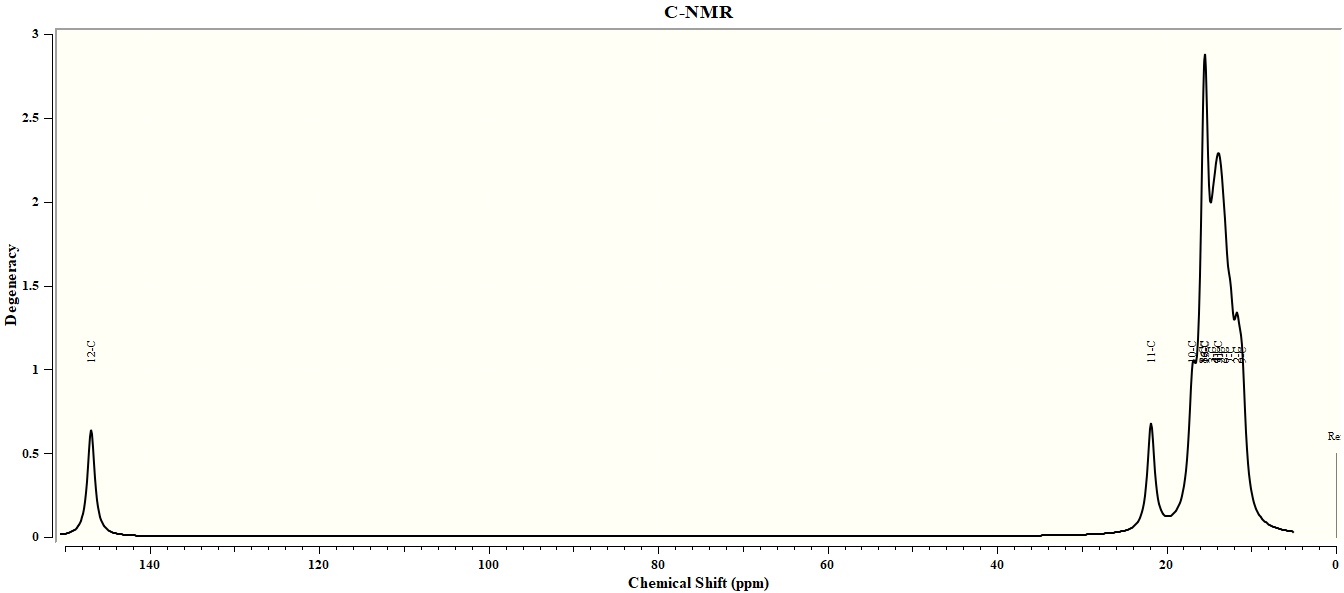  **B** |
| 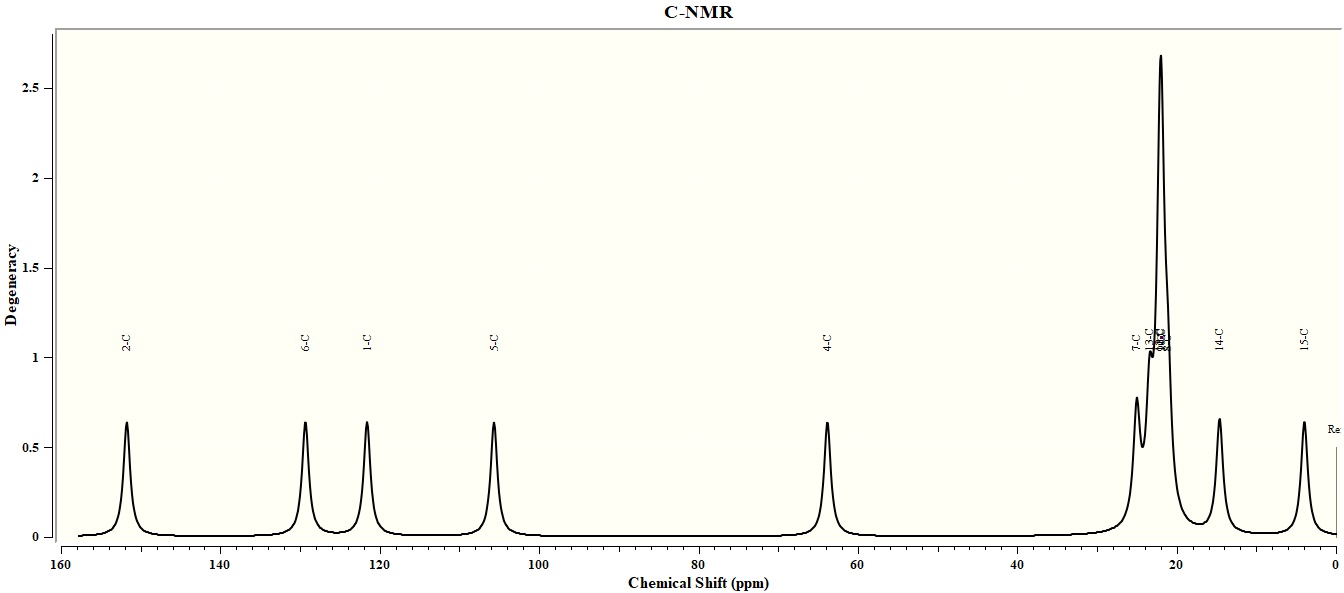  **C** |

**Figure S4:** Calculated 13C NMR isotropic chemical shift spectrum of 5-chloro-1-(trimethylsilyl)-1*H*-indole-2,3-dione 3-[O-(trimethylsilyl)-oxime] (A); cyclopentadecanone oxime (B); *trans*-2-dodecen-1-ol trifluoroacetate (C), respectively in chloroform solvent.

| 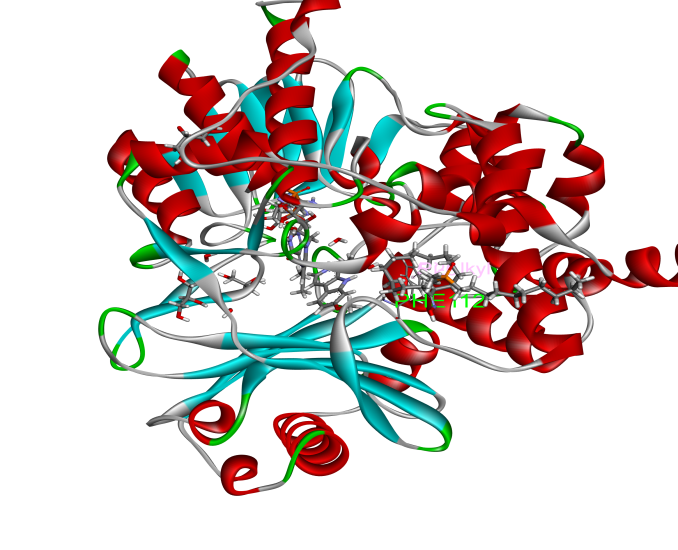  **A** | 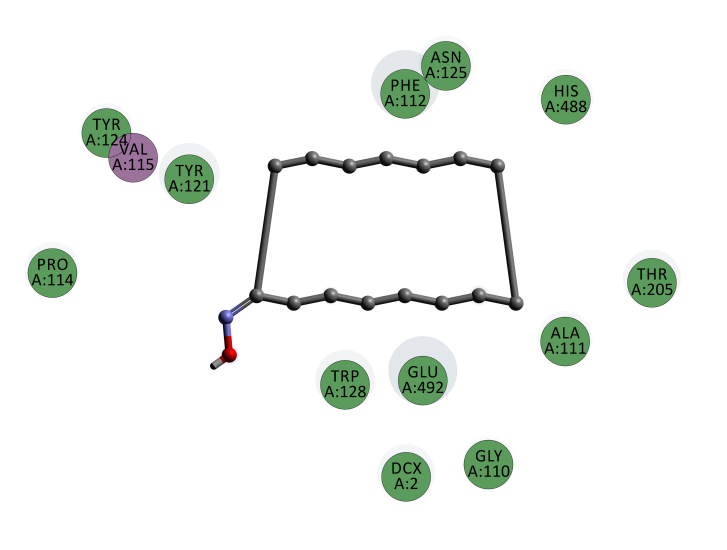 |
| --- | --- |
|  |  |
| 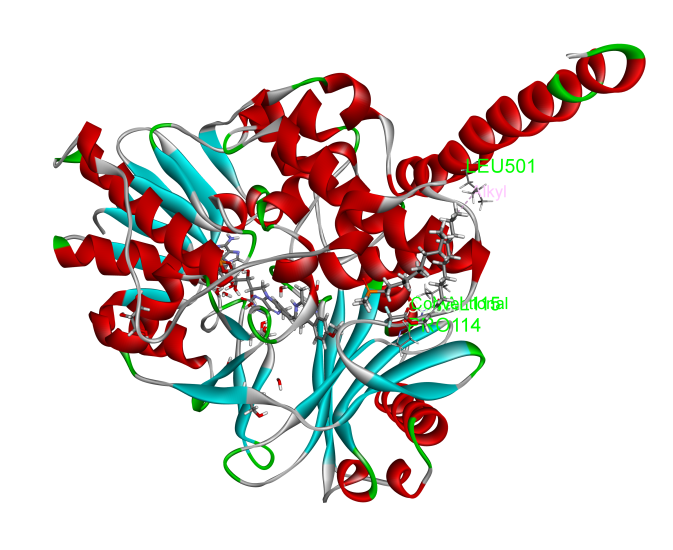  **B** | 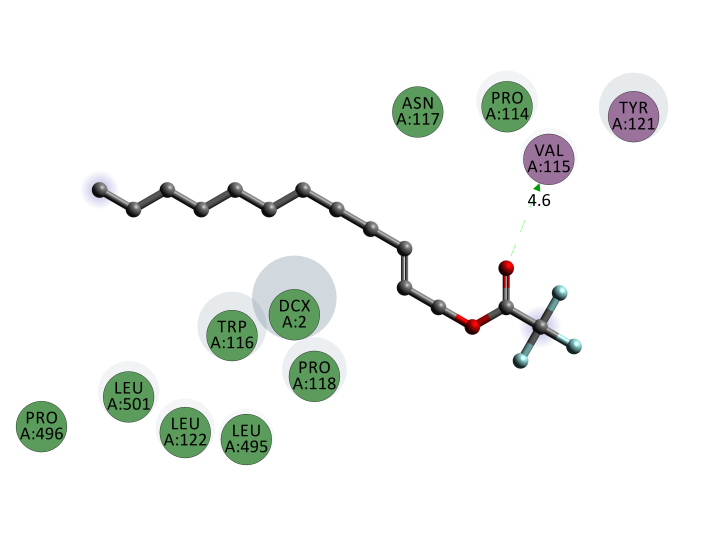 |
| 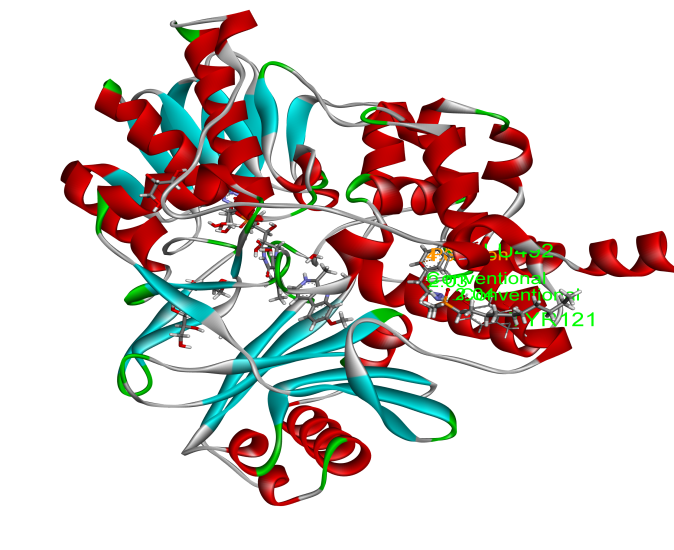  **C** | 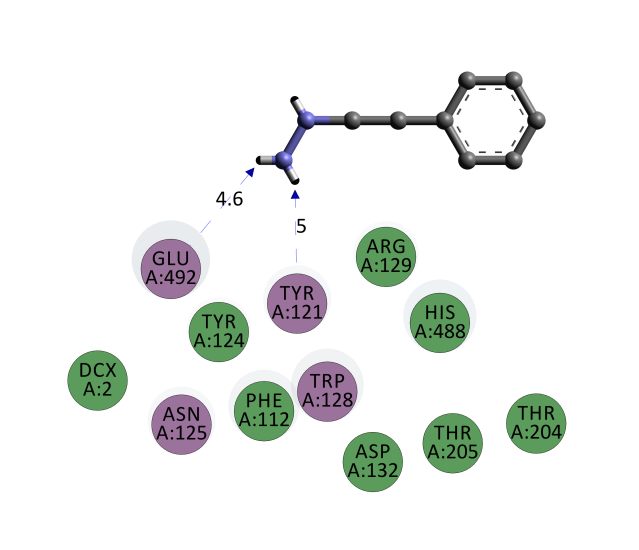 |

Figure S5: 3D and 2D interactions of cyclopentadecanone oxime (A); *trans*-2-dodecen-1-ol trifluoroacetate (B); phenelzine (C), against the human monoamine oxidase A (PDB: 2Z5X) for antidepressant activity.

| 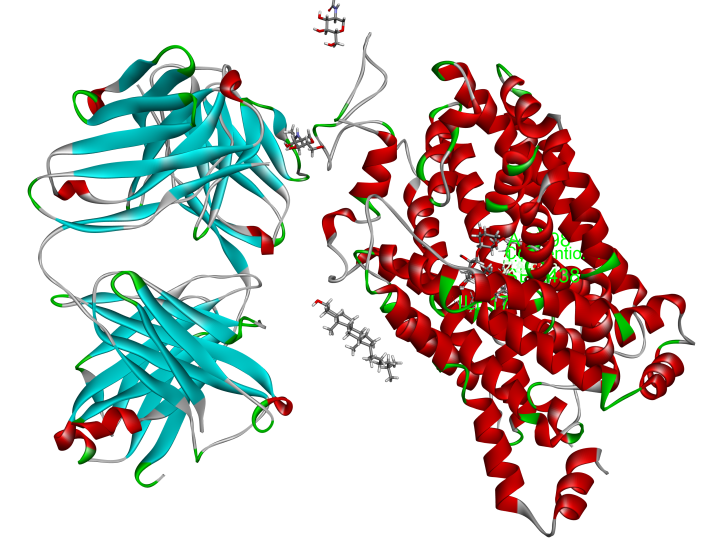  **A** | 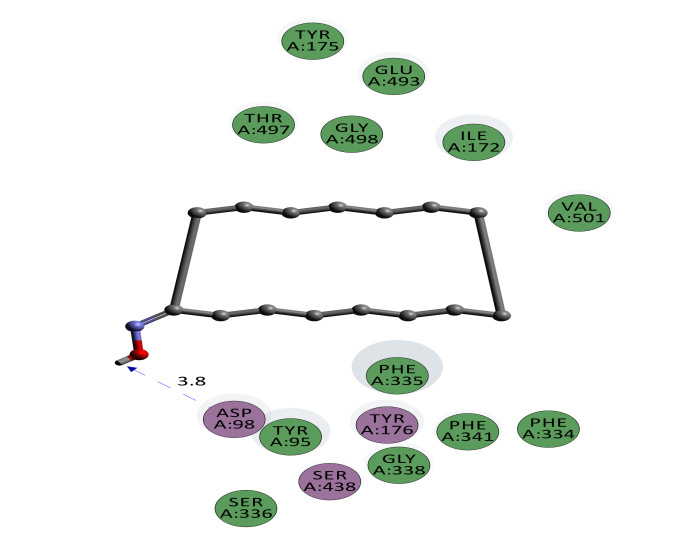 |
| --- | --- |
|  |  |
| 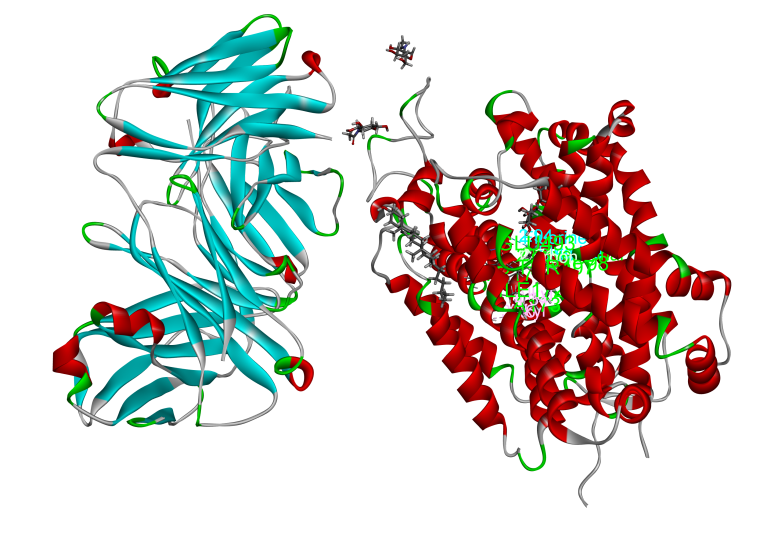  **B** | 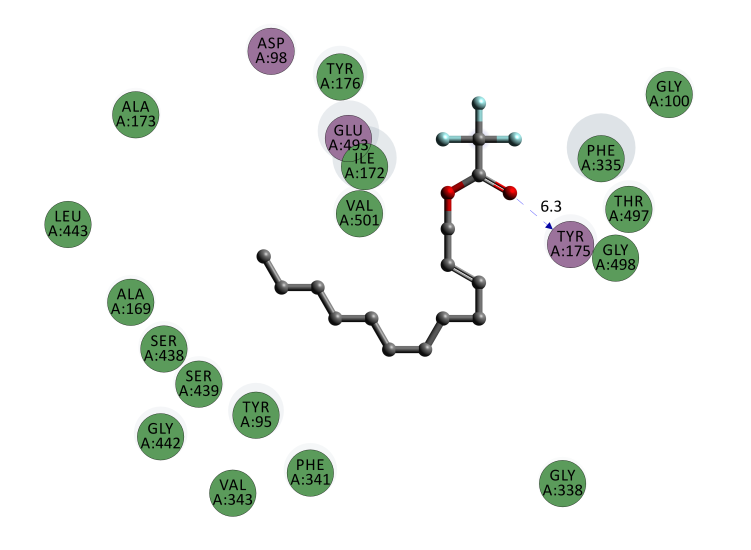 |
| 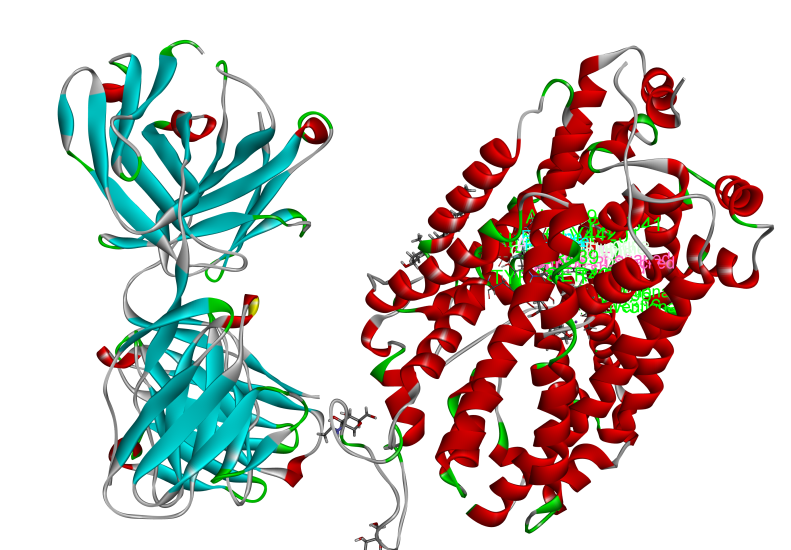  **C** | 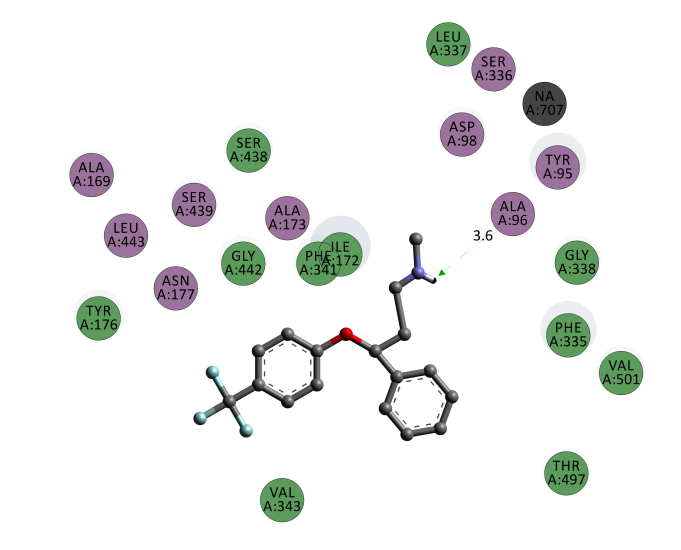 |

Figure S6: 3D and 2D interactions of cyclopentadecanone oxime (A); *trans*-2-dodecen-1-ol trifluoroacetate (B); fluoxetine (C), against the human serotonin receptor (PDB: 5I6X) for antidepressant activity.

| 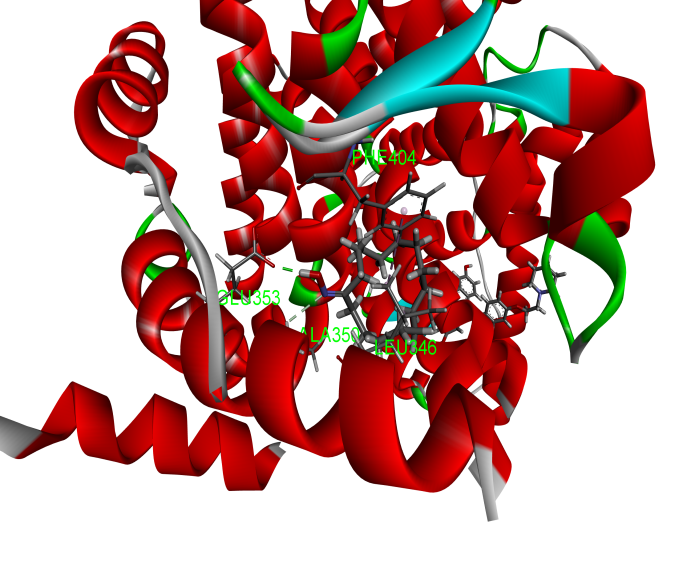  **A** | 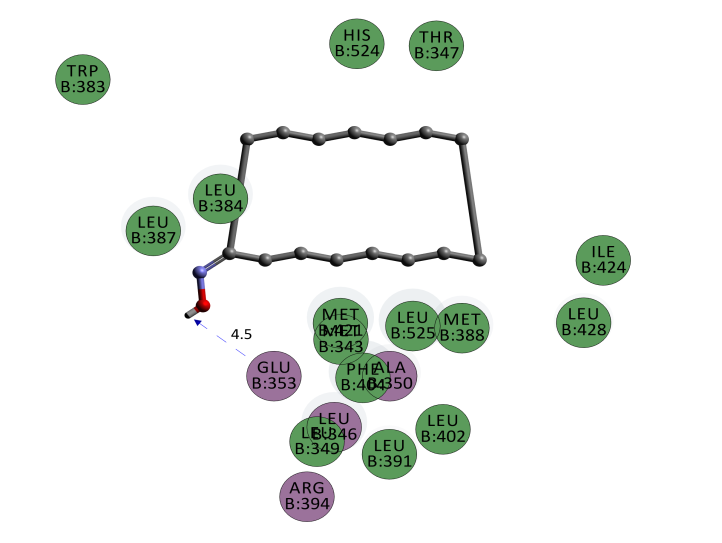 |
| --- | --- |
|  |  |
| 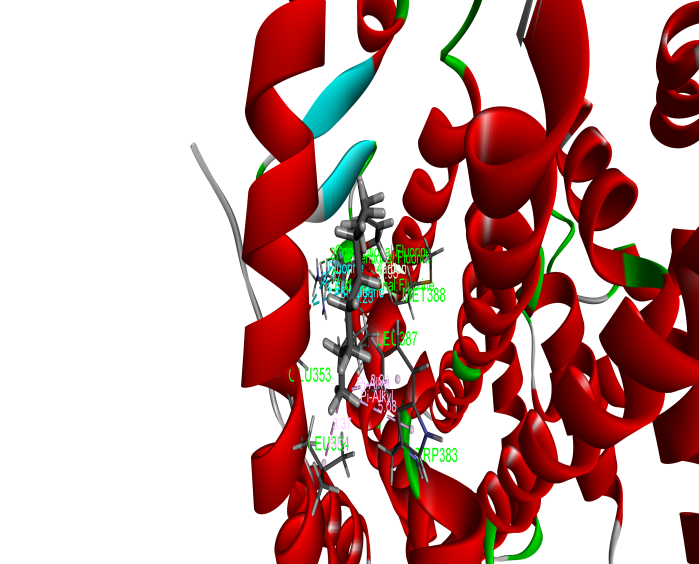  **B** | 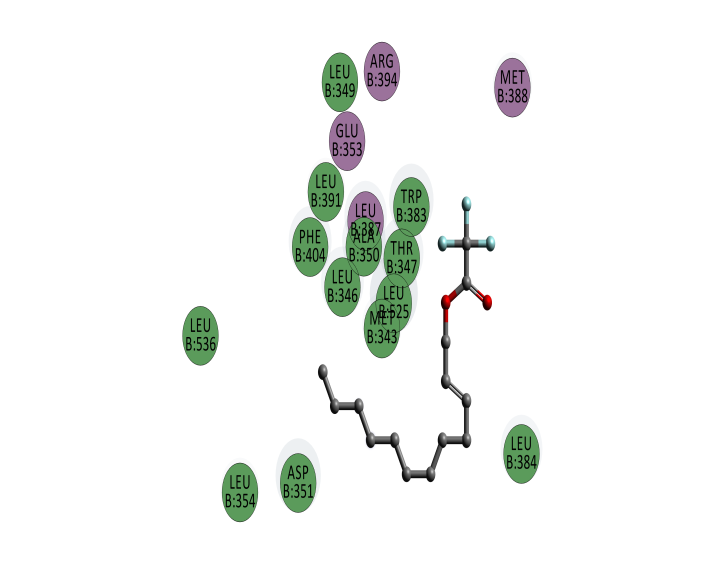 |
| 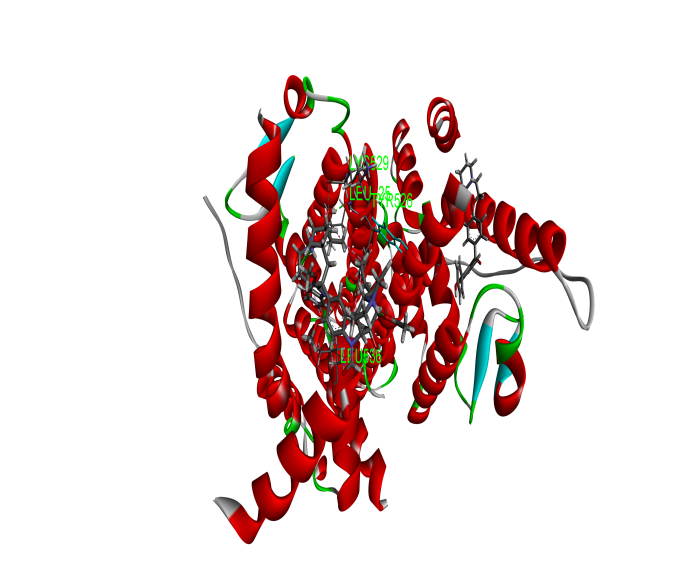  **C** | 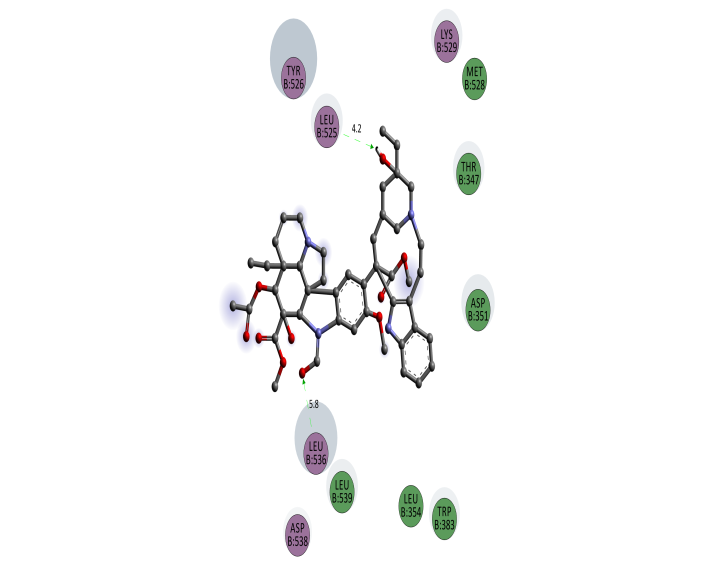 |

Figure S7: 3D and 2D interactions of cyclopentadecanone oxime (A); *trans*-2-dodecen-1-ol trifluoroacetate (B); vincristine sulfate (C), against the human estrogen receptor (PDB ID: 1ERR) for cytotoxicity activity.

| 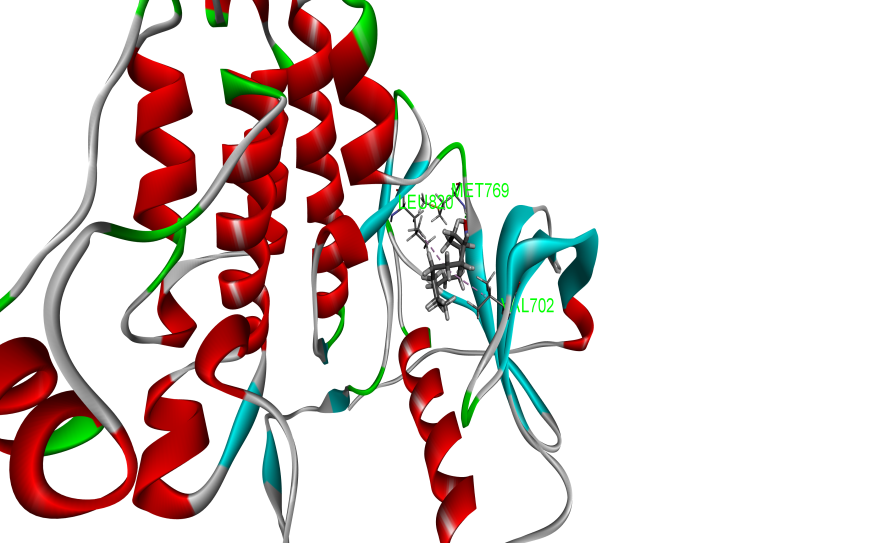  **A** | 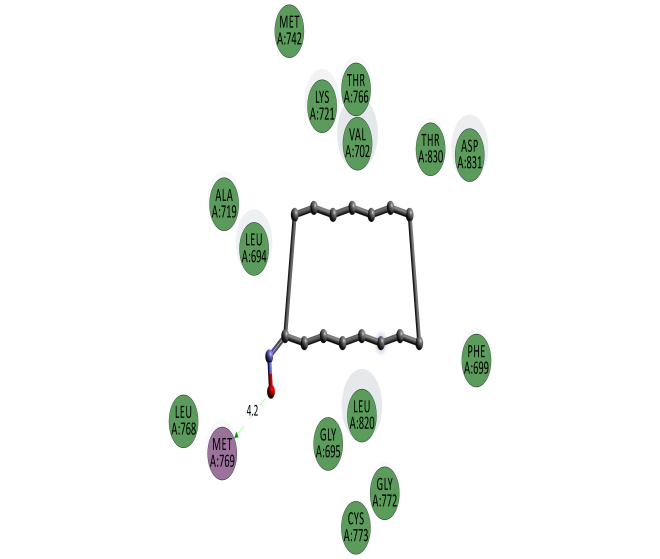 |
| --- | --- |
|  |  |
| 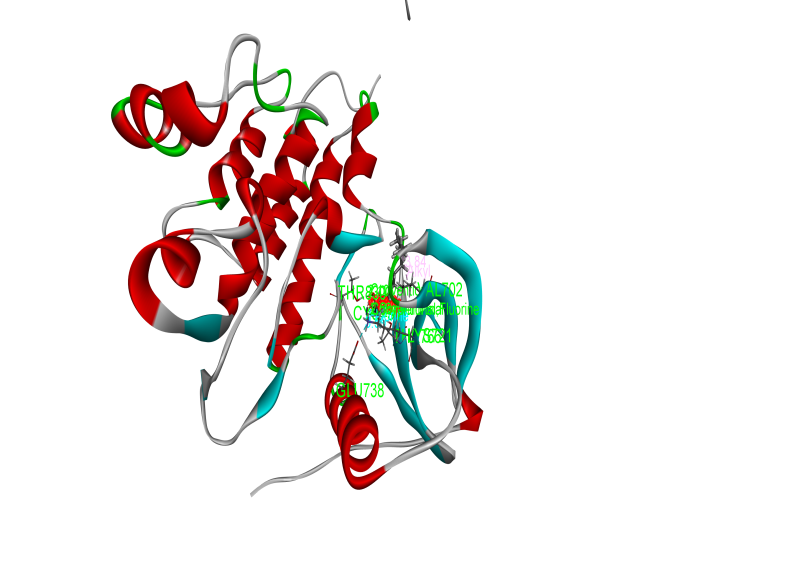  **B** | 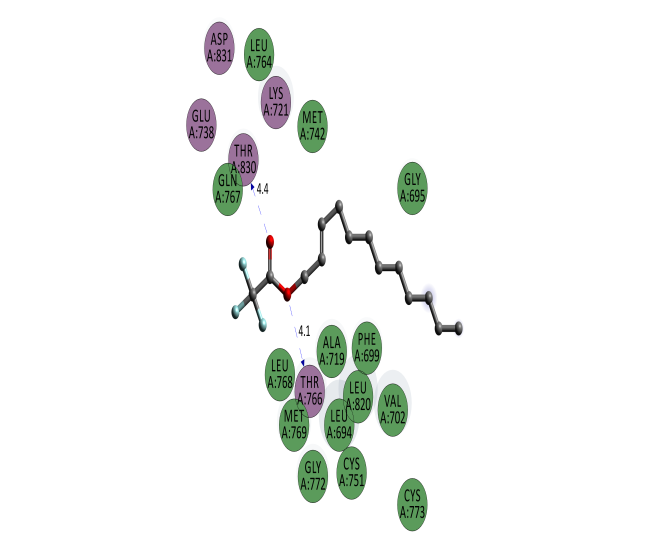 |
| 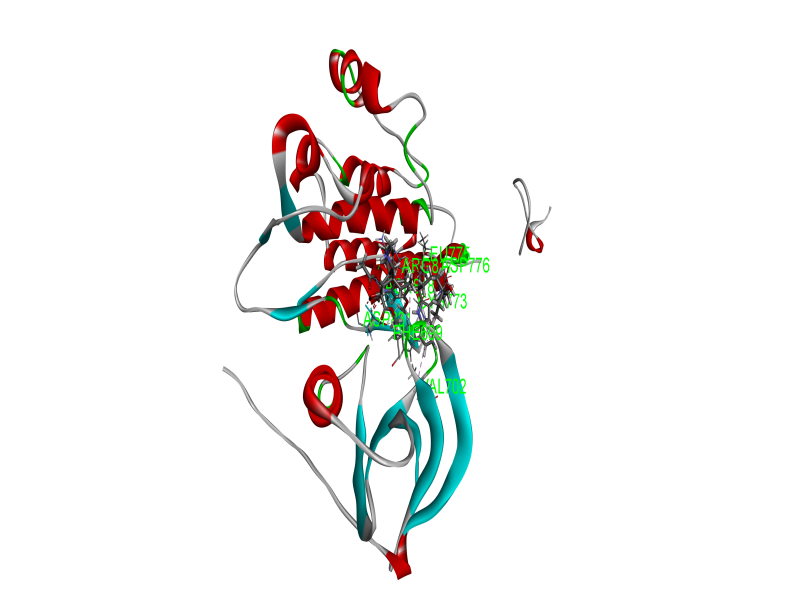  **C** | 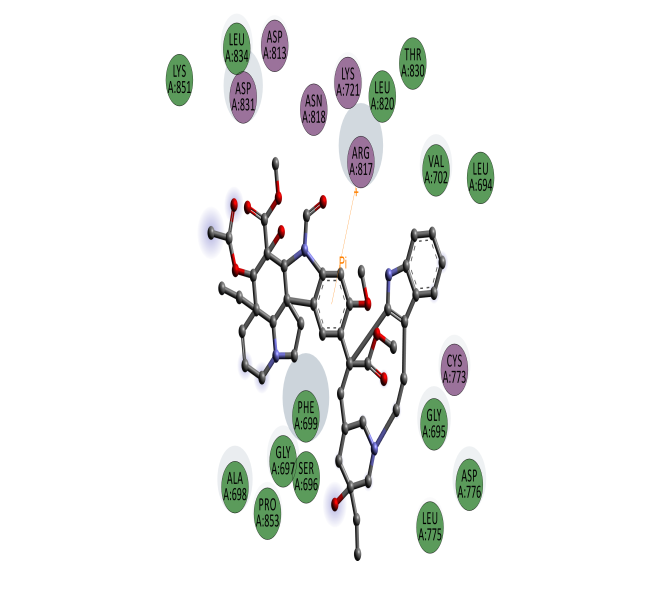 |

Figure S8: 3D and 2D interactions of cyclopentadecanone oxime (A); *trans*-2-dodecen-1-ol trifluoroacetate (B); vincristine sulfate (C), against the epidermal growth factor receptor tyrosine kinase (PDB ID: 1M17) for cytotoxicity activity.
